# Supplementary material for: Molecular Biomarkers in Glioblastoma: A Systematic Review and Meta-Analysis
Source: Int J Mol Sci. 2022 Aug 9;23(16):8835. doi: 10.3390/ijms23168835 (PMC9408540; doi:10.3390/ijms23168835)
Supplement: Supplementary file 1 [file ijms-23-08835-s001.zip › ijms-1833492-supplementary.pdf]

**Supplementary Table S1: Overall Survival sensitivity analysis of MGMT methylation**

| <b>Alkylating agents</b>          | <b>HR (95% CI)</b>      | <b>Test for overall effect: Z (p-value)</b> |
|-----------------------------------|-------------------------|---------------------------------------------|
| Han 2014                          | 1.67 [1.21,2.30]        | 3.12 (0.002)                                |
| Jan 2018 reference group          | 1.72[1.40,2.13]         | 5.06 (<0.00001)                             |
| Roodakker 2016 < 60years          | 1.59 [1.10,2.28]        | 2.48 (0.01)                                 |
| Roodakker 2016 > 60years          | 1.68 [1.16,2.43]        | 2.75 (0.006)                                |
| Tini 2015                         | 1.52 [1.10,2.11]        | 2.52 (0.01)                                 |
| Weller 2015                       | 1.52 [1.07,2.16]        | 2.36 (0.02)                                 |
| <b>All included</b>               | <b>1.66 [1.23,2.18]</b> | <b>3.40 (0.0007)</b>                        |
| <b>Tyrosine kinase inhibitors</b> |                         |                                             |
| Butowski 2011                     | 1.63 [1.20,2.21]        | 3.12 (0.002)                                |
| Cloughesy 2017                    | 1.69 [1.15,2.47]        | 2.68 (0.007)                                |
| Erdem Eraslan 2016                | 1.90 [1.16,3.13]        | 2.55 (0.01)                                 |
| Omuro 2014                        | 1.97 [1.40,2.77]        | 3.90 (<0.0001)                              |
| Reardon 2018                      | 1.80 [1.20,2.71]        | 2.84 (0.005)                                |
| Reardon 2020 Bevacizumab arm      | 1.85 [1.14,2.98]        | 2.59 (0.01)                                 |
| Wirsching 2018                    | 1.98 [1.29,3.04]        | 3.12 (0.002)                                |
| <b>All included</b>               | <b>1.82 [1.25,2.64]</b> | <b>3.16 (0.002)</b>                         |

HR and z-values represent the values obtained after removing the indicated study from the overall MGMT methylation subgroup analysis. Values in bold represents the HR and z-value including all the studies in the subgroup analysis.

**Supplementary Table S2: Overall Survival sensitivity analysis of IDH1 mutation**

| <b>Study ID</b>          | <b>HR (95% CI)</b>      | <b>Test for overall effect: Z (p-value)</b> |
|--------------------------|-------------------------|---------------------------------------------|
| Collins 2014             | 2.63 [1.29,5.34]        | 2.67 (0.008)                                |
| Erdem Eraslan 2016       | 2.46 [1.58,3.84]        | 3.97 (<0.0001)                              |
| Jan 2018 DCTA group      | 2.40 [1.83,3.15]        | 6.29 (<0.00001)                             |
| Jan 2018 Reference group | 2.35[1.78,3.09]         | 6.10 (<0.00001)                             |
| Latsch 2013              | 2.28 [1.72,3.02]        | 5.77 (<0.00001)                             |
| Reardon 2018             | 2.45 [1.71,3.53]        | 4.83 (<0.00001)                             |
| <b>All included</b>      | <b>2.37 [1.81,3.12]</b> | <b>6.21 (&lt;0.00001)</b>                   |

HR and z-values represent the values obtained after removing the indicated study from the overall MGMT methylation subgroup analysis. Values in bold represents the HR and z-value including all the studies in the subgroup analysis.

**Supplementary Table S3: Overall Survival sensitivity analysis of EGFR amplification or overexpression**

| <b>Study ID</b>     | <b>HR (95% CI)</b>      | <b>Test for overall effect: Z (p-value)</b> |
|---------------------|-------------------------|---------------------------------------------|
| Batchelor 2013      | 1.26 [0.92,1.74]        | 1.42 (0.15)                                 |
| Abdullah 2015       | 1.22 [0.090,1.66]       | 1.29 (0.20)                                 |
| Michaelson 2013     | 1.45 [0.94,2.24]        | 1.66 (0.10)                                 |
| Srividya 2010       | 1.48 [1.08,2.02]        | 2.42 (0.02)                                 |
| Tini 2015           | 1.17 [0.89,1.55]        | 1.11 (0.27)                                 |
| <b>All included</b> | <b>1.31 [0.97,1.78]</b> | <b>1.74 (0.08)</b>                          |

HR and z-values represent the values obtained after removing the indicated study from the overall MGMT methylation subgroup analysis. Values in bold represents the HR and z-value including all the studies in the subgroup analysis.
